# Supplementary material for: Nationwide Survival Benefit after Implementation of First-Line Immunotherapy for Patients with Advanced NSCLC—Real World Efficacy
Source: MDPI journal article supplement (doi:10.3390/cancers13194846), 2021-09-28
Supplement: s1 [file s1]

## Supplementary Materials: Nationwide Survival Benefit after Implementation of First-Line Immunotherapy for Patients with Advanced NSCLC—Real World Efficacy

Mette T. Mouritzen, Andreas Carus, Morten Ladekarl, Peter Meldgaard, Anders Winther Mølby Nielsen, Anna Livbjerg, Jacob W. Larsen, Halla Skuladottir, Charlotte Kristiansen, Kim Wedervang, Tine Schytte, Karin H. Hansen, Anne-Cathrine Østby, Malene S. Frank, Jakob Lauritsen, Jens B. Sørensen, Seppo W. Langer, Gitte F. Persson, Jon L. Andersen, Johanna M. C. Frary, Lars B. Drivsholm, Charles Vesteghem, Heidi S. Christensen, Birgitte Bjørnhart and Mette Pøhl

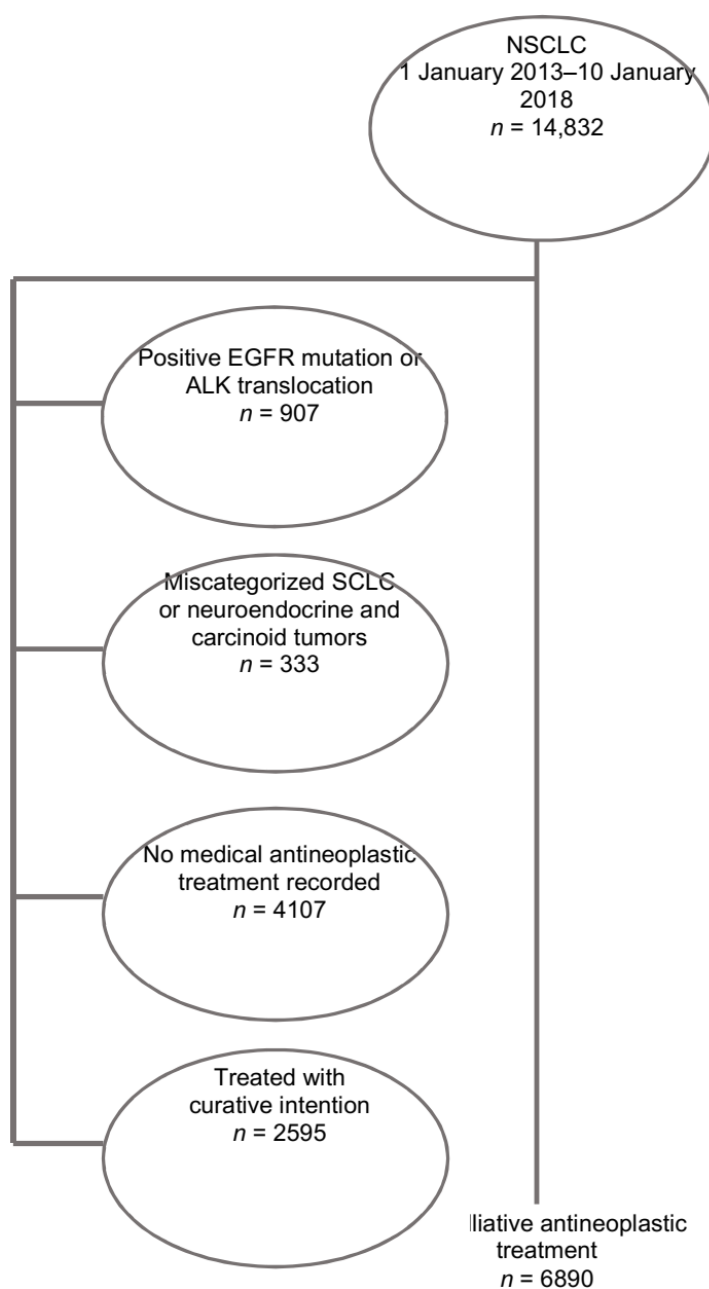

**Figure S1.** Criteria applied to the DLCR dataset.

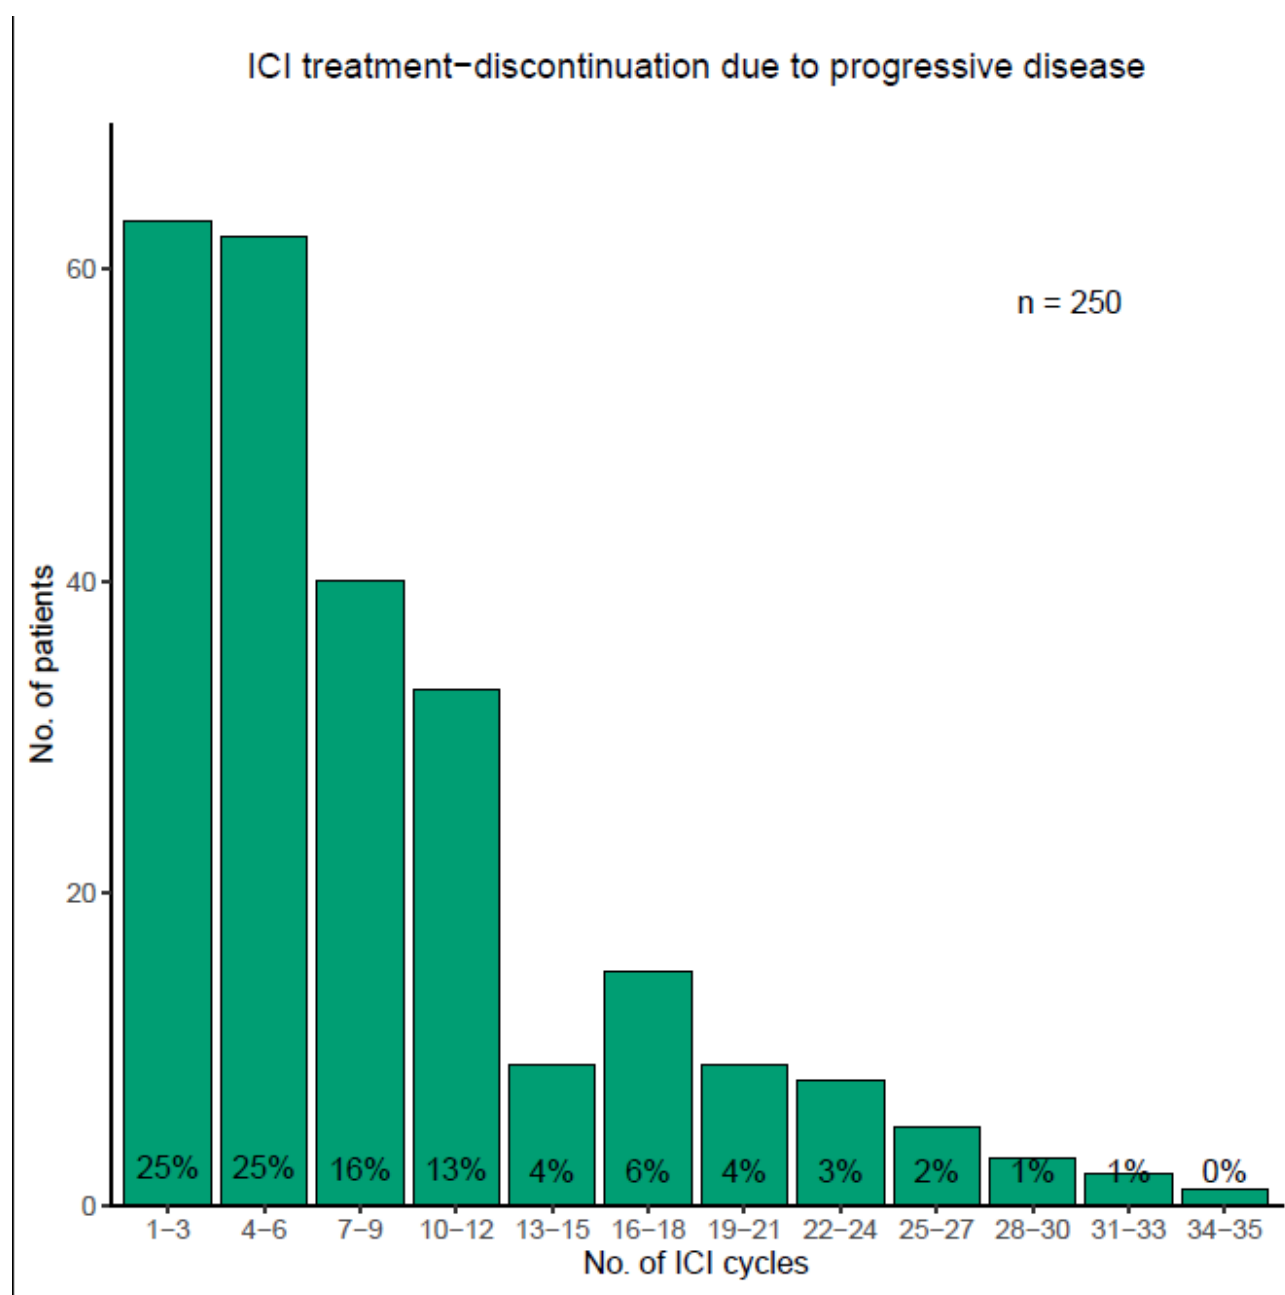

Figure S2. ICI treatment discontinuation due to progressive disease.

Figure S2:

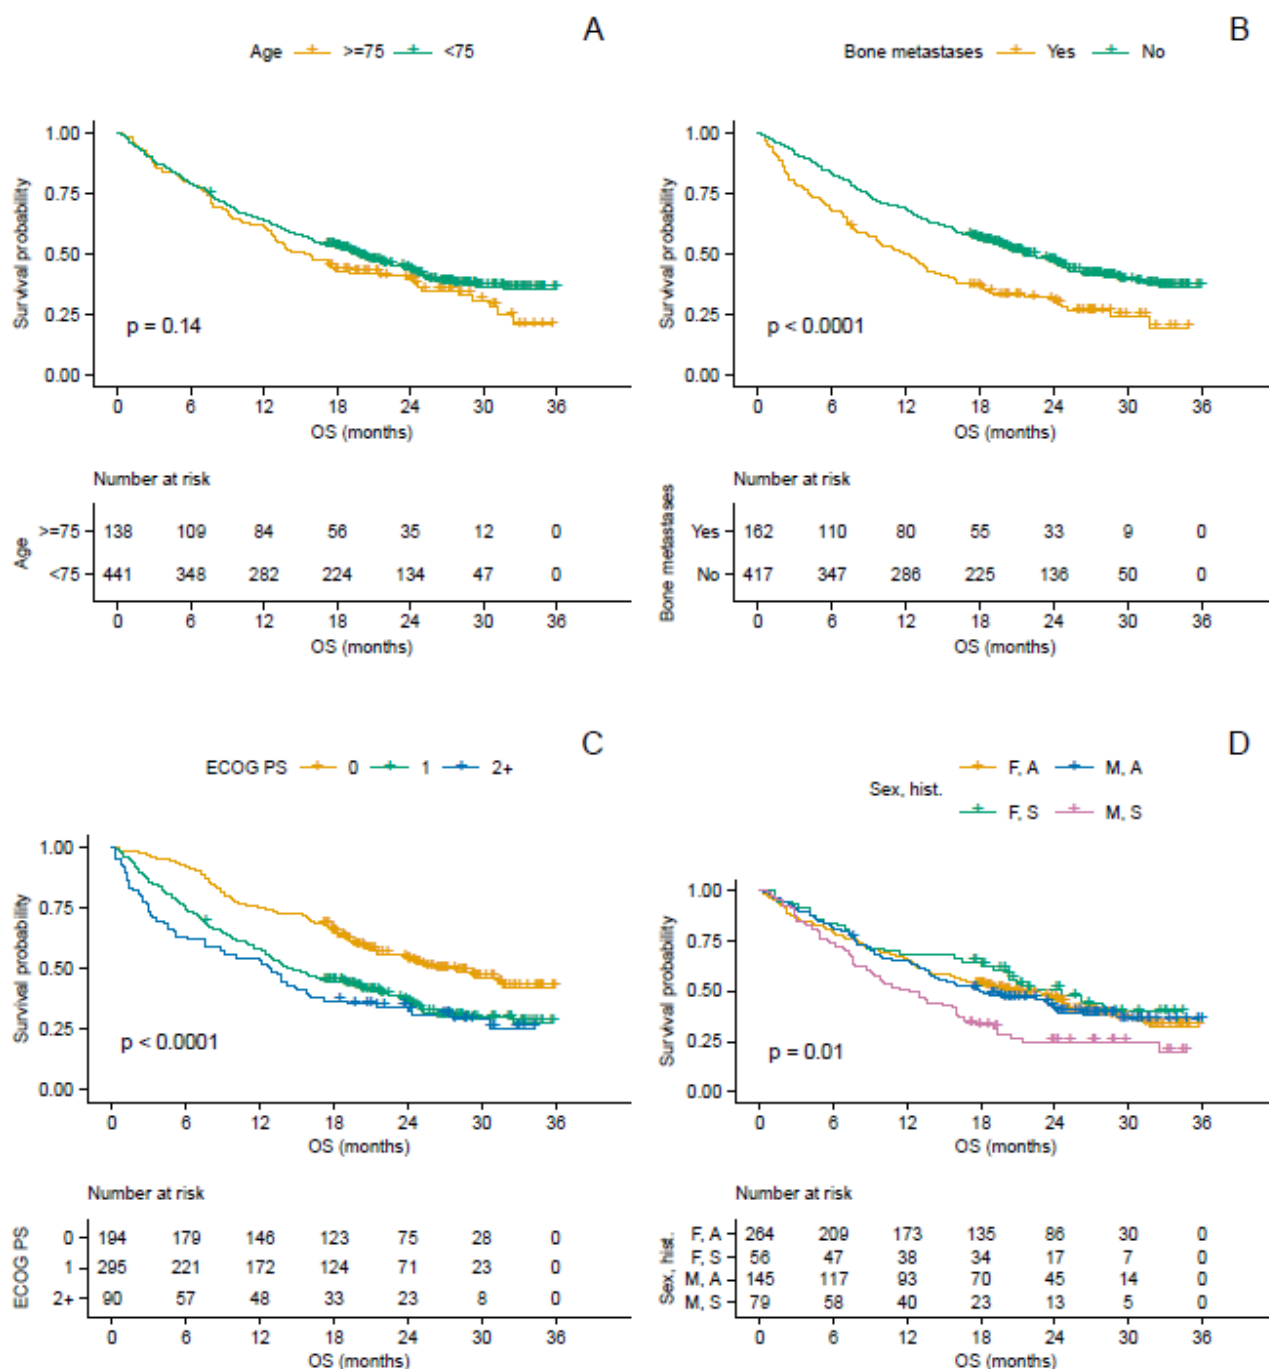

**Figure S3.** Kaplan–Meier curves for the EHR-identified ICI cohort according to age, bone metastases, performance status, and sex and histopathology.

**Table S1.** Comparison of baseline characteristics in the DLCR pre- and post-approval cohorts

| Baseline Characteristics  | DLCR<br>Pre-Approval Cohort<br><i>n</i> (%) | DLCR<br>Post-Approval Cohort<br><i>n</i> (%) | <i>p</i> -Value |
|---------------------------|---------------------------------------------|----------------------------------------------|-----------------|
| All patients              | 1,658                                       | 2,055                                        |                 |
| Age, median years (range) | 68 (31–91)                                  | 70 (32–91)                                   | <0.0001         |
| Age                       |                                             |                                              |                 |
| ≥75 years                 | 361 (21.8)                                  | 495 (24.1)                                   | 0.10            |
| <75 years                 | 1,297 (78.2)                                | 1,560 (75.9)                                 |                 |
| Sex                       |                                             |                                              |                 |
| Male                      | 880 (53.1)                                  | 1,023 (49.8)                                 | 0.05            |
| Female                    | 778 (46.9)                                  | 1,032 (50.2)                                 |                 |
| CCIS                      |                                             |                                              |                 |
| 0                         | 859 (51.8)                                  | 1,109 (54.0)                                 | 0.42            |
| 1                         | 356 (21.5)                                  | 424 (20.6)                                   |                 |
| 2+                        | 443 (26.7)                                  | 522 (25.4)                                   |                 |
| TNM stage <sup>a</sup>    |                                             |                                              |                 |
| IIIa                      | 113 (7.1)                                   | 254 (14.0)                                   | <0.0001         |
| IIIb                      | 196 (12.3)                                  | 261 (14.4)                                   |                 |
| IV                        | 1,194 (75.1)                                | 1,223 (67.6)                                 |                 |
| None                      | 86 (5.4)                                    | 71 (3.9)                                     |                 |
| Missing                   | 69                                          | 246                                          |                 |
| NSCLC histopathology      |                                             |                                              |                 |
| Adenocarcinoma            | 884 (53.3)                                  | 1,209 (58.8)                                 | <0.0001         |
| Squamous cell carcinoma   | 329 (19.8)                                  | 473 (23.0)                                   |                 |
| Other                     | 445 (26.8)                                  | 373 (18.2)                                   |                 |

Comparison of baseline characteristics in the DLCR pre- and post-approval cohorts. a) TNM classification of malignant tumors, 7th edition. DLCR, Danish Lung Cancer Registry; *n*, number; CTx, chemotherapy; ICI, immune checkpoint inhibitor; *n*, number of patients; CCIS, Charlson Comorbidity Index Score; TNM, tumor-node-metastasis classification of malignant tumors; NSCLC, non-small cell lung cancer.

**Table S2.** Comparison of baseline characteristics in the post-approval DLCR-CTx and DLCR-ICI cohorts.

| Baseline Characteristics  | DLCR-CTx<br><i>n</i> (%) | DLCR-ICI<br><i>n</i> (%) | <i>p</i> -Value |
|---------------------------|--------------------------|--------------------------|-----------------|
| All patients              | 1,573                    | 482                      |                 |
| Age, median years (range) | 70 (32–91)               | 70 (45–88)               | 0.98            |
| Age                       |                          |                          |                 |
| ≥75 years                 | 373 (23.7)               | 122 (25.3)               | 0.51            |
| <75 years                 | 1,200 (76.3)             | 360 (74.7)               |                 |
| Sex                       |                          |                          |                 |
| Male                      | 822 (52.3)               | 201 (41.7)               | <0.0001         |
| Female                    | 751 (47.7)               | 281 (58.3)               |                 |
| CCIS                      |                          |                          |                 |
| 0                         | 831 (52.8)               | 278 (57.7)               | 0.15            |
| 1                         | 329 (20.9)               | 95 (19.7)                |                 |
| 2+                        | 413 (26.3)               | 109 (22.6)               |                 |
| TNM stage <sup>a</sup>    |                          |                          |                 |
| IIIa                      | 202 (14.8)               | 52 (11.8)                | 0.16            |
| IIIb                      | 204 (14.9)               | 57 (12.9)                |                 |
| IV                        | 905 (66.2)               | 318 (71.9)               |                 |
| None                      | 56 (4.1)                 | 15 (3.4)                 |                 |
| Missing                   | 206                      | 40                       |                 |
| NSCLC histopathology      |                          |                          |                 |
| Adenocarcinoma            | 918 (58.4)               | 291 (60.4)               | 0.04            |
| Squamous cell carcinoma   | 381 (24.2)               | 92 (19.1)                |                 |
|                           |                          | 99 (20.5)                |                 |

Other 274 (17.4)

Comparison of baseline characteristics in the post-approval DLCR-CTx and DLCR-ICI cohorts. a) TNM classification of malignant tumors, 7th edition. DLCR, Danish Lung Cancer Registry; CTx, chemotherapy; ICI, immune checkpoint inhibitor; n, number of patients; CCIS, Charlson Comorbidity Index Score; TNM, tumor-node-metastasis classification of malignant tumors; NSCLC, non-small cell lung cancer.

**Table S3.** Time to treatment discontinuation (TTD).

| ICI Cohort                              | n (%)     | mTTD (Months) (95% CI) |
|-----------------------------------------|-----------|------------------------|
| All patients                            | 579 (100) | 4.8 (4.1–5.5)          |
| Age                                     |           |                        |
| <75 years                               | 441 (76)  | 4.9 (4.1–5.7)          |
| ≥75 years                               | 138 (24)  | 4.0 (3.4–6.2)          |
| Sex                                     |           |                        |
| Male                                    | 246 (42)  | 4.7 (3.6–5.8)          |
| Female                                  | 333 (58)  | 5.0 (3.8–5.9)          |
| ECOG PS                                 |           |                        |
| 0                                       | 194 (34)  | 6.9 (5.1–9.7)          |
| 1                                       | 295 (51)  | 4.3 (3.5–5.5)          |
| ≥2                                      | 90 (16)   | 2.8 (1.4–4.2)          |
| CCIS                                    |           |                        |
| 0–1                                     | 386 (67)  | 4.7 (3.6–5.6)          |
| 2+                                      | 193 (33)  | 5.4 (3.8–6.3)          |
| TNM stage                               |           |                        |
| III                                     | 109       | 5.4 (4.6–7.8)          |
| IV                                      | 470       | 4.5 (3.6–5.5)          |
| Brain metastases                        |           |                        |
| Yes                                     | 38 (7)    | 4.5 (2.2–7.8)          |
| No                                      | 541 (93)  | 4.8 (4.1–5.5)          |
| Bone metastases                         |           |                        |
| Yes                                     | 162 (28)  | 3.5 (2.5–4.8)          |
| No                                      | 417 (72)  | 5.5 (4.7–6.9)          |
| Liver metastases                        |           |                        |
| Yes                                     | 63 (11)   | 3.5 (1.8–6.2)          |
| No                                      | 516 (89)  | 4.9 (4.1–5.7)          |
| Adrenal metastases                      |           |                        |
| Yes                                     | 86 (15)   | 5.1 (2.6–7.6)          |
| No                                      | 493 (85)  | 4.8 (3.9–5.6)          |
| Distant lymph node metastases           |           |                        |
| Yes                                     | 174 (30)  | 5.5 (3.5–6.5)          |
| No                                      | 405 (70)  | 4.7 (3.8–5.5)          |
| NSCLC histopathology                    |           |                        |
| Adenocarcinoma                          | 409 (71)  | 5.0 (4.1–5.8)          |
| Squamous cell carcinoma                 | 135 (23)  | 3.7 (3.5–5.6)          |
| Other                                   | 35 (6)    | 4.7 (2.8–13.1)         |
| PD-L1                                   |           |                        |
| <50 %                                   | 23 (4)    | 5.5 (2.9–7.7)          |
| ≥50 %                                   | 552 (95)  | 4.8 (3.8–5.5)          |
| Unknown                                 | 4 (1)     |                        |
| Prior treatment with curative intention |           |                        |
| Surgery +/- adj. CTx                    | 39 (7)    | 11.7 (8.7–18.7)        |
| CRT                                     | 46 (8)    | 10.9 (8.2–20.3)        |
| Surgery and CRT                         | 16 (3)    | 19.1 (6.6–NR)          |
| None                                    | 478 (83)  | 11.1 (9.1–12.7)        |
| Prior palliative RT                     |           |                        |
| Yes                                     | 71 (12)   | 8.9 (7.2–13.8)         |
| No                                      | 508 (88)  | 11.5 (9.7–12.8)        |

Time to treatment discontinuation (TTD) with 95% confidence intervals (CI) according to selected baseline characteristics. ICI, immune-checkpoint inhibitor; n, number of patients; mTTD, median time to treatment discontinuation; ECOG PS, Eastern Cooperative Oncology Group performance status; CCIS, Charlson Comorbidity Index Score; TNM, tumor-node-metastasis classification of malignant tumors; NSCLC, non-small cell lung cancer; PD-L1, programmed death-ligand 1; adj. CTx, adjuvant chemotherapy; CRT, chemoradiotherapy; RT, radiotherapy.

**Table S4.** Median OS and PFS according to selected baseline characteristics of ICI-treated patients.

| ICI Cohort                              | n (%)     | mOS (Months) (95% CI) | Log-Rank Test | mPFS (Months) (95% CI) | Log-Rank Test |
|-----------------------------------------|-----------|-----------------------|---------------|------------------------|---------------|
| All patients                            | 579 (100) | 18.3 (16.0–21.3)      |               | 8.2 (7.2–9.3)          |               |
| Age                                     |           |                       |               |                        |               |
| <75 years                               | 441 (76)  | 19.6 (16.5–23.1)      | 0.13          | 8.2 (7.4–9.8)          | 0.29          |
| ≥75 years                               | 138 (24)  | 15.6 (12.8–23.6)      |               | 7.9 (6.0–10.3)         |               |
| Sex                                     |           |                       |               |                        |               |
| Male                                    | 246 (42)  | 15.2 (13.0–18.3)      | 0.03          | 7.1 (6.0–8.5)          | 0.57          |
| Female                                  | 333 (58)  | 21.5 (18.0–25.1)      |               | 8.8 (7.9–11.8)         |               |
| ECOG PS                                 |           |                       |               |                        |               |
| 0                                       | 194 (34)  | 28.0 (21.5–NR)        | < 0.0001      | 11.0 (8.5–13.9)        | 0.00          |
| 1                                       | 295 (51)  | 14.6 (12.7–19.0)      |               | 7.7 (6.4–8.8)          |               |
| ≥2                                      | 90 (16)   | 12.8 (7.6–16.1)       |               | 6.0 (3.3–8.7)          |               |
| CCIS                                    |           |                       |               |                        |               |
| 0–1                                     | 386 (67)  | 19.0 (15.9–23.1)      | 0.85          | 8.2 (6.9–9.9)          | 0.64          |
| 2+                                      | 193 (33)  | 17.2 (15.3–23.5)      |               | 8.0 (6.6–9.8)          |               |
| TNM stage                               |           |                       |               |                        |               |
| III                                     | 109       | 20.2 (14.6–29.0)      | 0.39          | 8.8 (7.1–13.6)         | 0.11          |
| IV                                      | 470       | 17.7 (15.8–21.4)      |               | 8.0 (6.8–9.2)          |               |
| Brain metastases                        |           |                       |               |                        |               |
| Yes                                     | 38 (7)    | 17.1 (8.2–24.1)       | 0.16          | 11.3 (3.7–12.8)        | 0.20          |
| No                                      | 541 (93)  | 19.0 (16.0–21.7)      |               | 8.1 (7.1–8.9)          |               |
| Bone metastases                         |           |                       |               |                        |               |
| Yes                                     | 162 (28)  | 12.0 (9.5–14.9)       | < 0.0001      | 5.7 (4.4–7.8)          | < 0.0001      |
| No                                      | 417 (72)  | 21.5 (19.0–24.9)      |               | 9.4 (8.1–12.0)         |               |
| Liver metastases                        |           |                       |               |                        |               |
| Yes                                     | 63 (11)   | 13.4 (6.0–21.4)       | 0.00          | 3.9 (2.5–12.8)         | 0.06          |
| No                                      | 516 (89)  | 19.0 (16.1–22.5)      |               | 8.3 (7.6–9.5)          |               |
| Adrenal metastases                      |           |                       |               |                        |               |
| Yes                                     | 86 (15)   | 15.8 (12.5–24.1)      | 0.23          | 8.3 (5.4–12.4)         | 0.22          |
| No                                      | 493 (85)  | 19.0 (16.4–21.5)      |               | 8.1 (7.1–9.4)          |               |
| Distant lymph node metastases           |           |                       |               |                        |               |
| Yes                                     | 174 (30)  | 19.6 (15.7–25.0)      | 0.65          | 8.7 (6.9–12.3)         | 0.18          |
| No                                      | 405 (70)  | 17.6 (15.3–20.5)      |               | 8.0 (6.5–9.2)          |               |
| NSCLC histopathology                    |           |                       |               |                        |               |
| Adenocarcinoma                          | 409 (71)  | 19.6 (16.4–24.0)      | 0.33          | 8.5 (7.8–10.7)         | 0.13          |
| Squamous cell carcinoma                 | 135 (23)  | 16.0 (12.1–20.2)      |               | 6.7 (5.8–8.2)          |               |
| Other                                   | 35 (6)    | 19.1 (9.33–NR)        |               | 12.0 (3.4–NR)          |               |
| PD-L1                                   |           |                       |               |                        |               |
| <50 %                                   | 23 (4)    | 14.9 (9.3–NR)         | 0.80          | 7.0 (5.0–12.0)         | 0.09          |
| ≥50 %                                   | 552 (95)  | 18.3 (16.0–21.5)      |               | 8.2 (7.3–9.4)          |               |
| Unknown                                 | 4 (1)     |                       |               |                        |               |
| Prior treatment with curative intention |           |                       |               |                        |               |
| Surgery +/- adj. CTx                    | 39 (7)    | 19.4 (13.8–NR)        | 0.72          | 9.2 (7.6–18.3)         | 0.76          |
| CRT                                     | 46 (8)    | 18.3 (13.7–NR)        |               | 8.1 (7.0–13.0)         |               |
| Surgery and CRT                         | 16 (3)    | 24.4 (9.8–NR)         |               | 12.3 (6.0–NR)          |               |
| None                                    | 478 (83)  | 18.0 (15.8–21.3)      | 0.03          | 8.0 (6.6–8.8)          | 0.23          |
| Prior palliative RT                     | 71 (12)   | 13.8 (10.1–21.8)      |               | 7.4 (4.0–12.5)         |               |

|     |          |                  |               |
|-----|----------|------------------|---------------|
| Yes | 508 (88) | 19.0 (16.1–22.5) | 8.2 (7.3–9.4) |
| No  |          |                  |               |

Median overall survival (mOS) and median progression-free survival (mPFS) with 95% confidence interval (CI) according to baseline characteristics. ICI, immune checkpoint inhibitor; *n*, number of patients; ECOG PS, Eastern Cooperative Oncology Group performance status; CCIS, Charlson Comorbidity Index Score; TNM, tumor-node-metastasis classification of malignant tumors; NSCLC, non-small cell lung cancer; PD-L1, programmed death-ligand 1; adj. CTx, adjuvant chemotherapy; CRT, chemoradiotherapy; RT, radiotherapy; NR, not reached.

**Table S5.** Univariable Cox regression analysis.

| ICI Cohort                              | <i>n</i> (%) | HR (95% CI)      | <i>p</i> -Value |
|-----------------------------------------|--------------|------------------|-----------------|
| Age                                     |              |                  |                 |
| <75 years                               | 441 (76)     | Reference        | 0.09            |
| ≥75 years                               | 138 (24)     | 1.23 (0.97–1.56) |                 |
| Sex                                     |              |                  |                 |
| Female                                  | 333 (58)     | Reference        | 0.07            |
| Male                                    | 246 (42)     | 1.22 (0.99–1.52) |                 |
| ECOG PS                                 |              |                  |                 |
| 0                                       | 194 (34)     | Reference        | < 0.001         |
| 1                                       | 295 (51)     | 1.80 (1.42–2.29) | < 0.001         |
| ≥2                                      | 90 (16)      | 2.28 (1.63–3.2)  |                 |
| CCIS                                    |              |                  |                 |
| 0–1                                     | 386 (67)     | Reference        | 0.91            |
| 2+                                      | 193 (33)     | 0.99 (0.79–1.24) |                 |
| Brain metastases                        |              |                  |                 |
| No                                      | 541 (93)     | Reference        | 0.19            |
| Yes                                     | 38 (7)       | 19.0 (0.87–1.98) |                 |
| Bone metastases                         |              |                  |                 |
| No                                      | 417 (72)     | Reference        | < 0.001         |
| Yes                                     | 162 (28)     | 1.77 (1.40–2.23) |                 |
| Liver metastases                        |              |                  |                 |
| No                                      | 516 (89)     | Reference        | 0.00            |
| Yes                                     | 63 (11)      | 1.73 (1.24–2.42) |                 |
| Adrenal metastases                      |              |                  |                 |
| No                                      | 493 (85)     | Reference        | 0.14            |
| Yes                                     | 86 (15)      | 1.24 (0.93–1.66) |                 |
| Distant lymph node metastases           |              |                  |                 |
| No                                      | 405 (70)     | Reference        | 0.99            |
| Yes                                     | 174 (30)     | 1.00 (0.79–1.27) |                 |
| NSCLC histopathology                    |              |                  |                 |
| Adenocarcinoma                          | 409 (71)     | Reference        | 0.18            |
| Squamous cell carcinoma                 | 135 (23)     | 1.18 (0.92–1.52) | 0.67            |
| Other                                   | 35 (6)       | 1.12 (0.69–1.78) |                 |
| PD-L1                                   |              |                  |                 |
| <50 %                                   | 23 (4)       | Reference        | 0.94            |
| ≥50 %                                   | 552 (95)     | 0.98 (0.57–1.69) |                 |
| Prior treatment with curative intention |              |                  |                 |
| None                                    | 478 (83)     | Reference        | 0.67            |
| Surgery +/- adj. CTx                    | 39 (7)       | 0.91 (0.59–1.41) | 0.23            |
| CRT                                     | 46 (8)       | 0.80 (0.56–1.15) | 0.30            |
| Surgery and CRT                         | 16 (3)       | 0.69 (0.34–1.39) |                 |
| Prior palliative RT                     |              |                  |                 |
| No                                      | 508 (88)     | Reference        | 0.03            |
| Yes                                     | 71 (12)      | 1.42 (1.03–1.96) |                 |

Weighted univariable Cox regression analysis with hazard ratios (HRs) according to baseline characteristics. PS 1, PS ≥2, liver metastases, bone metastases and prior palliative radiotherapy (RT) are associated with significantly reduced survival. ICI, immune checkpoint inhibitor; *n*, number of patients; ECOG PS, Eastern Cooperative Oncology Group performance

---

status; CCIS, Charlson Comorbidity Index Score; NSCLC, Non-small cell lung cancer; PD-L1, programmed death-ligand 1; adj. CTx, adjuvant chemotherapy; CRT, chemoradiotherapy; RT, radiotherapy.
